# Supplementary material
Source: MDPI journal article supplement (https://www.mdpi.com/2071-1050/12/21/8906)
Supplement: s1 [file s1]

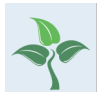

**Table S1.** Consumer survey questions.

| Question Number | Question                                                                                                                                                        | Possible answers                                                                                                                                                                                                              |
|-----------------|-----------------------------------------------------------------------------------------------------------------------------------------------------------------|-------------------------------------------------------------------------------------------------------------------------------------------------------------------------------------------------------------------------------|
| Q1              | How much would you pay for a black cotton t-shirt?                                                                                                              | <input type="radio"/> \$0-10<br><input type="radio"/> \$11-40<br><input type="radio"/> \$41-80<br><input type="radio"/> \$80+                                                                                                 |
| Q2              | Would you expect to keep a \$50 dollar t-shirt longer than a \$10 dollar t-shirt?                                                                               | Yes / No                                                                                                                                                                                                                      |
| Q3              | Would you expect a cotton \$50 t-shirt to be of better quality than a cotton \$10 t-shirt?                                                                      | Yes / No                                                                                                                                                                                                                      |
| Q4              | When shopping at a clothing store, what do you look for in a t-shirt before you purchase?<br>Select what applies to you (more than one option can be selected). | <input type="radio"/> Price<br><input type="radio"/> Quality<br><input type="radio"/> Content (fibre type)<br><input type="radio"/> Brand label<br><input type="radio"/> Care label<br><input type="radio"/> All of the above |
| Q5              | Do you know what fibre/fabric your clothes are made of?                                                                                                         | Yes / No                                                                                                                                                                                                                      |
| Q6              | Do you read the care label of your clothes?                                                                                                                     | Yes / No                                                                                                                                                                                                                      |
| Q7              | For each t-shirt price category listed below, do you follow the instructions on the care label?                                                                 | <input type="radio"/> At some point of the sale<br><input type="radio"/> Before cleaning<br><input type="radio"/> After use<br><input type="radio"/> Not at all                                                               |
| Q8              | How often would you wash a cotton t-shirt?                                                                                                                      | <input type="radio"/> After 1 wear<br><input type="radio"/> After 2 wears<br><input type="radio"/> After 3 wears<br><input type="radio"/> After 4 wears +                                                                     |
| Q9              | For each t-shirt price category listed below, indicate whether or not you expect a change in the colour of the t-shirt.                                         | <input type="radio"/> After 1 wash: Yes/No<br><input type="radio"/> After 10 washes: Yes/No                                                                                                                                   |
| Q10             | For each t-shirt price category listed below, indicate whether or not you expect a change in shape (e.g. increase, decrease, distortion)                        | <input type="radio"/> After 1 wash: Yes/No<br><input type="radio"/> After 10 washes: Yes/No                                                                                                                                   |
| Q11             | For each t-shirt price category listed below, how many times would you expect to wear a t-shirt before you would decide not to wear it any further?             | <input type="radio"/> 1<br><input type="radio"/> 5<br><input type="radio"/> 10<br><input type="radio"/> 20<br><input type="radio"/> 30                                                                                        |
